# Supplementary material
Source: PubMed Central journal article supplement (PMC3298129)

Table S1. PhyloPythia classification results for recovered antibiotic resistant metagenomic clones.

| Clone ID | Domain   | Phylum         | Class               |
|----------|----------|----------------|---------------------|
| kan1     | Bacteria | Proteobacteria | Alphaproteobacteria |
| kan2     | Bacteria | Actinobacteria |                     |
| kan3     | Bacteria | Proteobacteria | Alphaproteobacteria |
| kan4     | Bacteria |                |                     |
| gent1    | Bacteria | Proteobacteria | Alphaproteobacteria |
| chlor1   | Bacteria | Proteobacteria | Gammaproteobacteria |
| chlor2   | Bacteria | Proteobacteria |                     |
| chlor3   | Bacteria | Proteobacteria | Betaproteobacteria  |
| rif1     | Bacteria | Firmicutes     |                     |
| rif2     | Bacteria | Proteobacteria |                     |
| rif3     | Archaea  |                |                     |
| rif4     | Bacteria |                |                     |
| rif5     | Bacteria |                |                     |
| rif6     | Bacteria | Proteobacteria | Gammaproteobacteria |
| rif7     | Bacteria | Actinobacteria | Actinobacteria      |
| tri1     | Bacteria | Proteobacteria | Betaproteobacteria  |
| tri2     | Bacteria |                |                     |
| tri3     | Bacteria | Proteobacteria |                     |
| tri4     | Bacteria | Actinobacteria |                     |
| tri5     | Bacteria |                |                     |
| tri6     | Bacteria |                |                     |
| tri7     | Bacteria | Proteobacteria | Alphaproteobacteria |
| tri8     | Bacteria | Actinobacteria | Actinobacteria      |
| tri9     | Bacteria | Actinobacteria | Actinobacteria      |
| tri10    | Bacteria | Proteobacteria | Betaproteobacteria  |
| tri11    | Bacteria | Actinobacteria | Actinobacteria      |
| tri12    | Bacteria | Proteobacteria | Betaproteobacteria  |
| tri13    | Bacteria |                |                     |
| tri14    | Bacteria | Proteobacteria |                     |
| tri15    | Bacteria | Actinobacteria | Actinobacteria      |
| tri16    | Bacteria | Proteobacteria |                     |
| tri17    | Bacteria |                |                     |
| tri18    | Bacteria | Proteobacteria | Betaproteobacteria  |
| tri19    | Bacteria | Proteobacteria | Alphaproteobacteria |
| tri20    | Bacteria | Proteobacteria | Betaproteobacteria  |
| tet1     | Bacteria | Actinobacteria |                     |
| tet2     | Bacteria | Firmicutes     | Bacilli             |
| tet3     | Bacteria | Proteobacteria |                     |
| tet4     | Bacteria |                |                     |

# Supplementary Figure 1

A

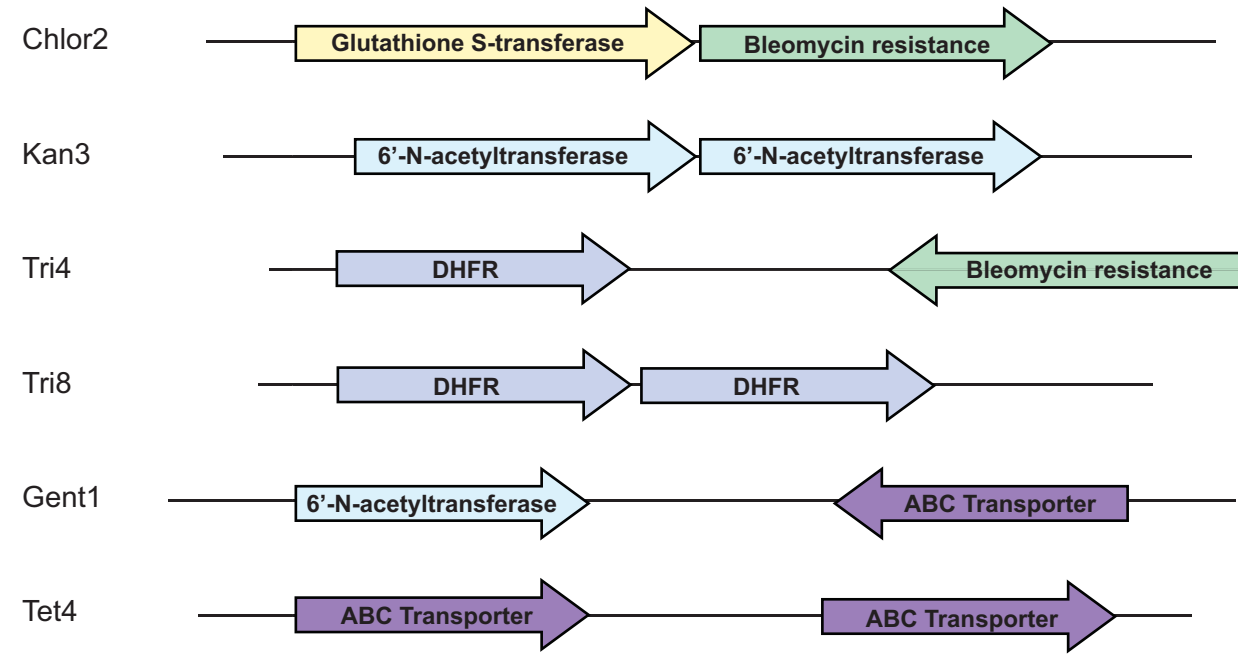

# Supplementary Figure 1

**B**

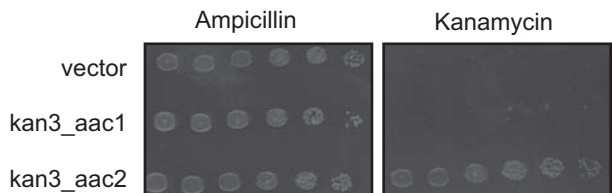

**C**

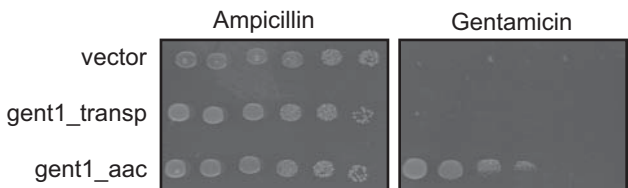

**D**

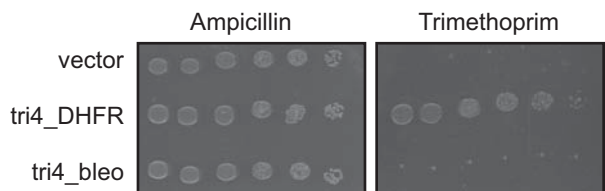

**E**

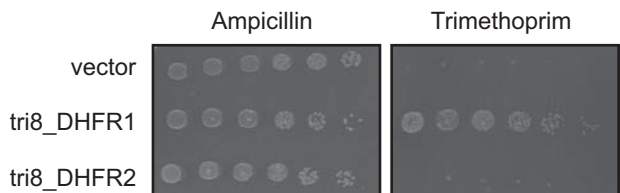

**F**

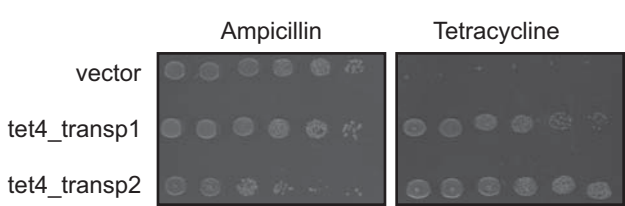

# Supplementary Figure 2

**A**

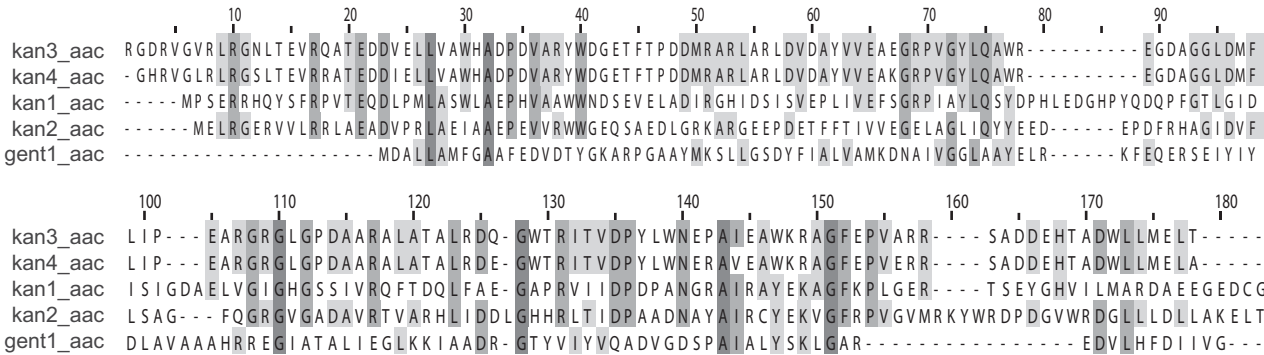

**B**

|           | kan1_aac | kan2_aac | kan3_aac | kan4_aac | gent1_aac |
|-----------|----------|----------|----------|----------|-----------|
| kan1_aac  | -        |          |          |          |           |
| kan2_aac  | 27%      | -        |          |          |           |
| kan3_aac  | 26%      | 31%      | -        |          |           |
| kan4_aac  | 27%      | 30%      | 92%      | -        |           |
| gent1_aac | 12%      | 14%      | 16%      | 14%      | -         |

# Supplementary Figure 3

|            | Q53CM2 | Z58IZ0 | B5WYT8 | B7VER9 | B7VES0 | B0FMU1 | Q79D79 | Q1HVJ4 | C5MRP4 |
|------------|--------|--------|--------|--------|--------|--------|--------|--------|--------|
| tri14_DHFR | 23%    | 24%    | 24%    | 23%    | 24%    | 22%    | 23%    | 24%    | 23%    |

## Supplementary Figure 4

**A**

```

      20           30           40           50           60           70
tri2_DHFR  H P F K A I A A M S E N R V I G R G N S I P W H L P E D F K W F K K M T T G - - - - - N T V V M G R K T F Q S
tri16_DHFR K H F K A I A A M A E N R V I G N G K A I P W H L P E D F K W F K R M T T G - - - - - Q V V V M G R K T F E S
tri1_DHFR  M R I S L V V A F D R E R A I G V D N R L P W H L P D D L K R F K A L T L G - - - - - K P I L M G R L T A E S
tri7_DHFR  I L T L G P V A R D R E G V I G K D G T L P W R L S D D L K R F K A L T L G - - - - - K P V I M G R K T W D S
tri19_DHFR L M I V V A V A Q N - - G V I G R D N Q L L W R L K T D L R R F K D L T W G - - - - - K P M I M G R K T F Q S
tri3_DHFR  M I L S A I V A V S D N D V M A K D G K I P W F V R G E Q L I F K R L T T G - - - - - P P I I M G R K T F E T
tri12_DHFR M V T M I A V A E N N A L G K D N K L L W H L P D D F K R F K K L T T G - - - - - H H I M G R K T F E S
tri17_DHFR M I V S F I V A V S D N N A I G R K N T L P W H L P E D L K F F K R T T I G - - - - - K P V I M G R K T Y E S
tri10_DHFR S R I S L I V A M A K N R V I G A G N K I P W H L P S E L K L F K S L T M G - - - - - H H I V M G R R T Y E S
Ecoli_DHFR M I S L I A A L A V D R V I G M E N A M P W N L P A D L A W F K R N T L N - - - - - K P V I M G R H T W E S
tri13_DHFR M R L S I V A A M D R N R V I G R G G A L P W R L S A D L Q R F K A L T M G - - - - - H H L M M G R K T F E S
tri4_DHFR  M K V T L V A A V A R G G V I G R G N T I P W R I P E D M A R F R V L T T G - - - - - H P V V M G R R T W D S
tri9_DHFR   I G L V W A Q A A N G V I G R D G T L P W Q L P E D L A R F K A L T T G - - - - - A T V V M G R A T W D S
tri8_DHFR  R R I V L V A A V A D N G V I G D G P N I P W H V P G E Q A G F K Q L T M G - - - - - R V L L M G R T T Y E T
tri15_DHFR R R V V L V A A V A R N R V I G D G P D I P W A L P G E Q R L F K E L T L G - - - - - H T L L M G R T T Y E S
tri11_DHFR  R I V L V A A V A E N G V I G A A G G I P W H L P E D F K H F K A T T L G - - - - - H T L V M G R A T Y D S
tri5_DHFR  M T I S L I A A V A R N G V I G S D G Q I P W R L P G E L P R F K A L T T G - - - - - H V L V M G R K T F D S
tri18_DHFR G E R G I M V A M S P E G V I G L E G K I P W H Y R G D L R R V K R L T L G - - - - - T T L I M G R V T W E S
tri6_DHFR  M S I K I I V A Y G R N H E I G Y E N G M P W H L P N E L R W V S K V T R H T T D P Q R R N A I V M G R R T W E S
  
```

**B**

|            | tri4_DHFR | tri5_DHFR | tri13_DHFR | !tri14_DHFR | tri19_DHFR |
|------------|-----------|-----------|------------|-------------|------------|
| tri4_DHFR  | -         |           |            |             |            |
| tri5_DHFR  | 44%       | -         |            |             |            |
| tri13_DHFR | 39%       | 38%       | -          |             |            |
| tri14_DHFR | 7%        | 9%        | 9%         | -           |            |
| tri19_DHFR | 42%       | 41%       | 40%        | 7%          | -          |

# Supplementary Figure 5

A

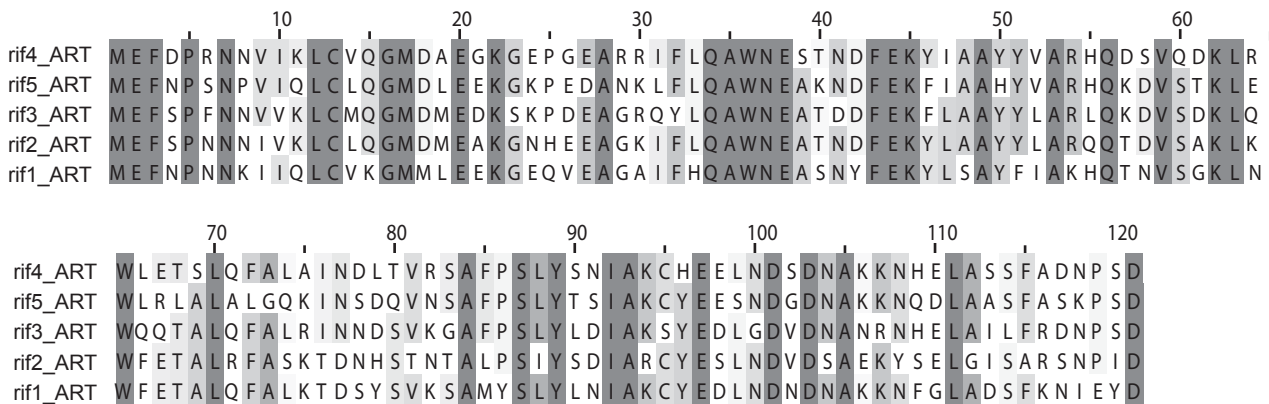

# Supplementary Figure 6

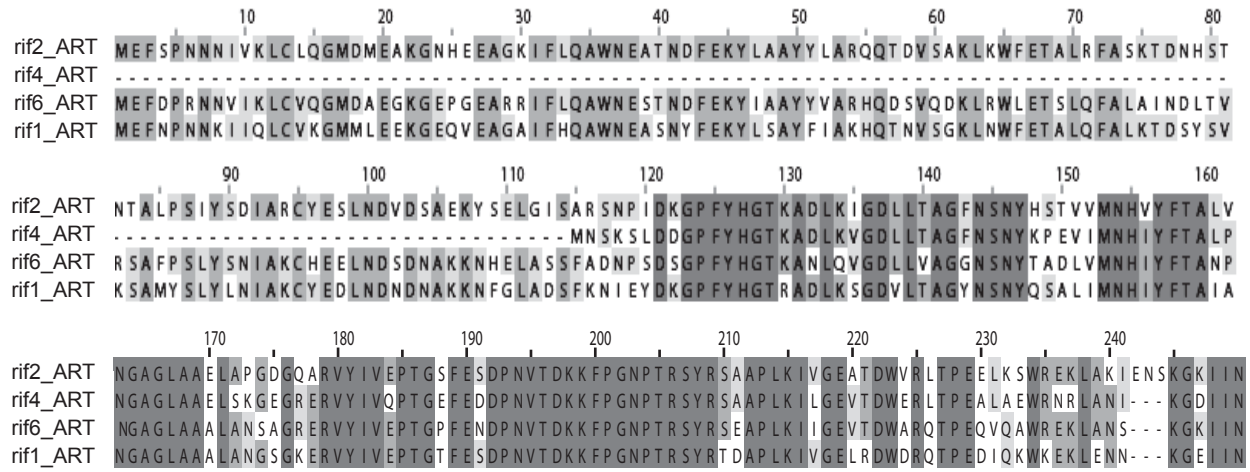

Supplement: supp_78.6.1708_AEM6759-11_supplemental_material.pdf [file supp_78.6.1708_AEM6759-11_supplemental_material.pdf]
